# Supplementary material for: Comparison of Chromatic and Spectrophotometric Properties of White and Red Wines Produced in Galicia (Northwest Spain) by Applying PCA
Source: MDPI journal article supplement (doi:10.3390/molecules27207000), 2022-10-18
Supplement: s1 [file s1]

**Table S1.** Some chromatic characteristics of Galician red wines.

| Wine codes | Color                  |                        |                          | CIELab                    |                          |
|------------|------------------------|------------------------|--------------------------|---------------------------|--------------------------|
|            | % yellow               | % red                  | % blue                   | a                         | b                        |
| R1         | 34.29 <sup>vw</sup>    | 54.34 <sup>ab</sup>    | 11.38 <sup>r</sup>       | 8.97 <sup>o</sup>         | 5.44 <sup>ijklmn</sup>   |
| R2         | 33.60 <sup>x</sup>     | 54.46 <sup>ab</sup>    | 11.94 <sup>qr</sup>      | -3.13 <sup>p</sup>        | 0.52 <sup>p</sup>        |
| R3         | 51.10 <sup>efg</sup>   | 11.09 <sup>s</sup>     | 37.81 <sup>ab</sup>      | 20.42 <sup>hijkl</sup>    | 4.17 <sup>ijklmnop</sup> |
| R4         | 53.52 <sup>abcd</sup>  | 10.46 <sup>s</sup>     | 36.02 <sup>abcd</sup>    | 26.68 <sup>abcdef</sup>   | 5.82 <sup>ghijklmn</sup> |
| R5         | 37.29 <sup>tu</sup>    | 38.59 <sup>ijklm</sup> | 24.12 <sup>e</sup>       | 16.19 <sup>lm</sup>       | 2.71 <sup>mnop</sup>     |
| R6         | 41.28 <sup>qrs</sup>   | 42.79 <sup>fg</sup>    | 15.93 <sup>ijklmn</sup>  | 22.49 <sup>defghij</sup>  | 4.51 <sup>ijklmno</sup>  |
| R7         | 38.19 <sup>tu</sup>    | 44.72 <sup>ef</sup>    | 17.08 <sup>hijkl</sup>   | 22.7 <sup>defghij</sup>   | 4.10 <sup>ijklmnop</sup> |
| R8         | 33.98 <sup>wx</sup>    | 53.78 <sup>ab</sup>    | 12.25 <sup>qr</sup>      | 0.26 <sup>p</sup>         | 2.35 <sup>nop</sup>      |
| R9         | 51.96 <sup>def</sup>   | 11.99 <sup>s</sup>     | 36.05 <sup>abcd</sup>    | 20.02 <sup>ijkl</sup>     | 3.41 <sup>klmnop</sup>   |
| R10        | 53.88 <sup>abcd</sup>  | 10.34 <sup>s</sup>     | 35.78 <sup>abcd</sup>    | 29.19 <sup>ab</sup>       | 6.38 <sup>ghijklm</sup>  |
| R11        | 39.79 <sup>rst</sup>   | 44.58 <sup>ef</sup>    | 15.62 <sup>ijklmno</sup> | 24.03 <sup>bcdefghi</sup> | 4.92 <sup>ijklmn</sup>   |
| R12        | 33.71 <sup>x</sup>     | 53.94 <sup>ab</sup>    | 12.35 <sup>pqr</sup>     | 7.48 <sup>o</sup>         | 4.49 <sup>ijklmno</sup>  |
| R13        | 51.77 <sup>def</sup>   | 11.36 <sup>s</sup>     | 36.87 <sup>abc</sup>     | 29.83 <sup>ab</sup>       | 6.68 <sup>ghijkl</sup>   |
| R14        | 55.04 <sup>a</sup>     | 11.19 <sup>s</sup>     | 33.77 <sup>d</sup>       | 28.47 <sup>abc</sup>      | 6.06 <sup>ghijklmn</sup> |
| R15        | 38.64 <sup>stu</sup>   | 39.62 <sup>hijkl</sup> | 21.74 <sup>ef</sup>      | 23.64 <sup>cdefghij</sup> | 5.65 <sup>hijklmn</sup>  |
| R16        | 39.63 <sup>rst</sup>   | 46.40 <sup>e</sup>     | 13.97 <sup>mnopqr</sup>  | 26.79 <sup>abcdef</sup>   | 5.71 <sup>hijklmn</sup>  |
| R17        | 33.52 <sup>x</sup>     | 54.26 <sup>ab</sup>    | 12.22 <sup>qr</sup>      | 7.57 <sup>o</sup>         | 5.02 <sup>ijklmn</sup>   |
| R18        | 50.79 <sup>efg</sup>   | 11.59 <sup>s</sup>     | 37.62 <sup>ab</sup>      | 31.00 <sup>a</sup>        | 7.61 <sup>ghi</sup>      |
| R19        | 53.13 <sup>abcde</sup> | 10.95 <sup>s</sup>     | 35.92 <sup>abcd</sup>    | 28.90 <sup>abc</sup>      | 6.47 <sup>ghijklm</sup>  |
| R20        | 37.69 <sup>tu</sup>    | 41.23 <sup>ghi</sup>   | 21.07 <sup>f</sup>       | 25.95 <sup>abcdefg</sup>  | 5.26 <sup>ijklmn</sup>   |
| R21        | 34.07 <sup>wx</sup>    | 54.57 <sup>a</sup>     | 11.36 <sup>r</sup>       | 7.97 <sup>o</sup>         | 4.71 <sup>ijklmn</sup>   |
| R22        | 52.02 <sup>cdef</sup>  | 10.72 <sup>s</sup>     | 37.26 <sup>ab</sup>      | 27.05 <sup>abcdef</sup>   | 5.56 <sup>ijklmn</sup>   |
| R23        | 54.02 <sup>abcd</sup>  | 10.73 <sup>s</sup>     | 35.25 <sup>bcd</sup>     | 30.48 <sup>a</sup>        | 7.02 <sup>ghijkl</sup>   |
| R24        | 38.88 <sup>stu</sup>   | 41.11 <sup>ghij</sup>  | 20.01 <sup>fg</sup>      | 24.23 <sup>bcdefghi</sup> | 5.17 <sup>ijklmn</sup>   |
| R25        | 36.67 <sup>uvw</sup>   | 41.99 <sup>fgh</sup>   | 21.34 <sup>f</sup>       | 24.18 <sup>bcdefghi</sup> | 4.58 <sup>ijklmno</sup>  |
| R26        | 51.99 <sup>cdef</sup>  | 10.69 <sup>s</sup>     | 7.46 <sup>s</sup>        | 27.37 <sup>abcde</sup>    | 6.39 <sup>ghijkl</sup>   |
| R27        | 53.04 <sup>abcde</sup> | 10.41 <sup>s</sup>     | 36.56 <sup>abc</sup>     | 18.06 <sup>jkl</sup>      | 3.30 <sup>op</sup>       |
| R28        | 54.86 <sup>ab</sup>    | 10.82 <sup>s</sup>     | 34.32 <sup>cd</sup>      | 28.65 <sup>abc</sup>      | 6.66 <sup>ghijkl</sup>   |
| R29        | 38.88 <sup>stu</sup>   | 41.11 <sup>ghij</sup>  | 20.01 <sup>fg</sup>      | 7.37 <sup>o</sup>         | 0.77 <sup>op</sup>       |
| R30        | 36.49 <sup>uvw</sup>   | 42.18 <sup>fgh</sup>   | 21.33 <sup>f</sup>       | 21.54 <sup>efghijkl</sup> | 3.67 <sup>ijklmnop</sup> |
| R31        | 53.20 <sup>abcde</sup> | 10.41 <sup>s</sup>     | 7.28 <sup>s</sup>        | 29.29 <sup>ab</sup>       | 7.14 <sup>ghijk</sup>    |
| R32        | 52.26 <sup>bcdef</sup> | 11.26 <sup>s</sup>     | 36.48 <sup>abcd</sup>    | 27.02 <sup>abcdef</sup>   | 5.79 <sup>ghijklmn</sup> |
| R33        | 49.83 <sup>fgh</sup>   | 11.98 <sup>s</sup>     | 38.20 <sup>a</sup>       | 27.96 <sup>abcd</sup>     | 7.85 <sup>ghi</sup>      |
| R34        | N.A. <sup>x</sup>      | N.A. <sup>t</sup>      | N.A. <sup>t</sup>        | 29.12 <sup>abc</sup>      | 9.55 <sup>g</sup>        |
| R35        | 38.36 <sup>tu</sup>    | 39.60 <sup>hijkl</sup> | 22.04 <sup>ef</sup>      | 29.41 <sup>ab</sup>       | 9.41 <sup>gh</sup>       |
| R36        | 47.75 <sup>hijk</sup>  | 37.83 <sup>lmno</sup>  | 14.42 <sup>lmnopq</sup>  | 22.67 <sup>defghij</sup>  | 26.80 <sup>c</sup>       |
| R37        | 45.16 <sup>klmn</sup>  | 37.72 <sup>lmno</sup>  | 17.13 <sup>hijkl</sup>   | 25.75 <sup>abcdefgh</sup> | 22.28 <sup>cd</sup>      |
| R38        | 51.63 <sup>defg</sup>  | 32.24 <sup>qr</sup>    | 16.12 <sup>ijklmn</sup>  | 16.94 <sup>klm</sup>      | 30.69 <sup>b</sup>       |
| R39        | 47.95 <sup>hij</sup>   | 35.03 <sup>opq</sup>   | 17.03 <sup>hijkl</sup>   | 21.88 <sup>efghij</sup>   | 24.25 <sup>cd</sup>      |
| R40        | 46.15 <sup>ijklm</sup> | 40.87 <sup>ghijk</sup> | 12.98 <sup>opqr</sup>    | 22.70 <sup>defghij</sup>  | 6.75 <sup>ghijkl</sup>   |
| R41        | 43.70 <sup>mnopq</sup> | 38.17 <sup>klmn</sup>  | 18.13 <sup>ghij</sup>    | 20.59 <sup>ghijkl</sup>   | 5.45 <sup>ijklmn</sup>   |
| R42        | 46.91 <sup>ijkl</sup>  | 35.53 <sup>nop</sup>   | 17.56 <sup>ghijk</sup>   | 29.20 <sup>ab</sup>       | 20.67 <sup>de</sup>      |
| R43        | 44.85 <sup>lmno</sup>  | 41.23 <sup>ghi</sup>   | 13.93 <sup>nopqr</sup>   | 18.25 <sup>jkl</sup>      | 4.32 <sup>ijklmno</sup>  |
| R44        | 51.51 <sup>defg</sup>  | 34.81 <sup>pq</sup>    | 13.68 <sup>nopqr</sup>   | 25.73 <sup>abcdefgh</sup> | 27.33 <sup>bc</sup>      |
| R45        | 42.14 <sup>opqr</sup>  | 38.87 <sup>ijklm</sup> | 18.99 <sup>ghi</sup>     | 29.36 <sup>ab</sup>       | 17.58 <sup>ef</sup>      |
| R46        | 44.27 <sup>lmnop</sup> | 41.20 <sup>ghi</sup>   | 14.53 <sup>lmnopq</sup>  | 29.50 <sup>ab</sup>       | 17.59 <sup>ef</sup>      |

|     |                        |                         |                         |                           |                          |
|-----|------------------------|-------------------------|-------------------------|---------------------------|--------------------------|
| R47 | 32.84 <sup>x</sup>     | 52.14 <sup>bc</sup>     | 15.02 <sup>klmnop</sup> | 10.51 <sup>no</sup>       | 0.40 <sup>p</sup>        |
| R48 | 32.74 <sup>x</sup>     | 49.92 <sup>cd</sup>     | 17.35 <sup>ghijk</sup>  | 11.96 <sup>mno</sup>      | 0.41 <sup>p</sup>        |
| R49 | 37.47 <sup>tu</sup>    | 46.92 <sup>e</sup>      | 15.60 <sup>jklmno</sup> | 31.02 <sup>a</sup>        | 6.74 <sup>ghijkl</sup>   |
| R50 | 36.81 <sup>uv</sup>    | 47.23 <sup>de</sup>     | 15.96 <sup>jklmn</sup>  | 28.85 <sup>abc</sup>      | 5.92 <sup>ghijklmn</sup> |
| R51 | 43.34 <sup>nopq</sup>  | 42.53 <sup>fg</sup>     | 14.14 <sup>mnopq</sup>  | 29.21 <sup>ab</sup>       | 15.20 <sup>f</sup>       |
| R52 | 49.03 <sup>ghi</sup>   | 36.53 <sup>mnop</sup>   | 14.44 <sup>lmnopq</sup> | 27.08 <sup>abcde</sup>    | 15.08 <sup>f</sup>       |
| R53 | 48.06 <sup>hij</sup>   | 37.75 <sup>lmno</sup>   | 14.19 <sup>mnopq</sup>  | 26.29 <sup>abcdef</sup>   | 17.39 <sup>ef</sup>      |
| R54 | 54.37 <sup>abc</sup>   | 31.98 <sup>r</sup>      | 13.65 <sup>nopqr</sup>  | 15.17 <sup>mn</sup>       | 38.16 <sup>a</sup>       |
| R55 | 46.94 <sup>ijkl</sup>  | 39.54 <sup>hijkl</sup>  | 13.51 <sup>nopqr</sup>  | 27.94 <sup>abcd</sup>     | 15.08 <sup>f</sup>       |
| R56 | 41.74 <sup>pqr</sup>   | 38.64 <sup>ijklm</sup>  | 19.62 <sup>fgh</sup>    | 24.37 <sup>bcdefghi</sup> | 6.79 <sup>ghijkl</sup>   |
| R57 | 45.53 <sup>jklmn</sup> | 37.76 <sup>lmno</sup>   | 16.70 <sup>ijklm</sup>  | 21.51 <sup>fghijkl</sup>  | 7.25 <sup>ghij</sup>     |
| R58 | 46.33 <sup>ijklm</sup> | 40.14 <sup>ghijkl</sup> | 13.53 <sup>nopqr</sup>  | 26.31 <sup>abcdef</sup>   | 17.13 <sup>ef</sup>      |

---

N.A.: not available. Data values in a column with different lowercase letters are statically different ( $p \leq 0.05$ )

**Table S2.** Some chromatic characteristics of Galician white wines.

| Wine codes | Color      |                |             | CIELab      |          |
|------------|------------|----------------|-------------|-------------|----------|
|            | % yellow   | % red          | % blue      | a           | b        |
| W1         | 49.55 mn   | 27.16 efghijk  | 23.28 b     | 1.75 abcd   | 7.54 i   |
| W2         | 51.35 jklm | 26.73 ghijkl   | 21.92 bc    | 1.81 abc    | 7.39 i   |
| W3         | 49.56 mn   | 29.17 bcdef    | 21.27 bc    | 1.77 abcd   | 7.93 i   |
| W4         | 52.07 ijkl | 27.49 defghij  | 20.44 cd    | 1.57 abcd   | 7.45 i   |
| W5         | 51.04 jklm | 27.46 defghij  | 21.50 bc    | 1.86 abc    | 7.79 i   |
| W6         | 50.76 klm  | 27.36 defghij  | 21.88 bc    | 1.69 abcd   | 7.29 i   |
| W7         | 51.31 jklm | 27.41 defghij  | 21.28 bc    | 1.66 abcd   | 7.72 i   |
| W8         | 50.53 klm  | 28.57 bcdefgh  | 20.90 cd    | 1.81 abc    | 8.04 i   |
| W9         | 50.74 klm  | 27.30 defghijk | 21.96 bc    | 2.07 ab     | 7.93 i   |
| W10        | 46.89 o    | 29.66 abcd     | 23.45 b     | 1.55 abcd   | 7.98 i   |
| W11        | 49.71 mn   | 29.36 abcde    | 20.93 cd    | 1.62 abcd   | 8.37 i   |
| W12        | 52.19 ijkl | 28.81 bcdefg   | 19.00 cde   | 1.69 abcd   | 8.61 i   |
| W13        | 50.12 lmn  | 29.30 abcdef   | 20.58 cd    | 1.68 abcd   | 8.47 i   |
| W14        | 48.20 no   | 30.15 abc      | 21.65 bc    | 1.44 abcde  | 6.40 i   |
| W15        | 47.88 no   | 30.42 ab       | 21.69 bc    | 1.63 abcd   | 7.26 i   |
| W16        | 47.88 no   | 30.96 a        | 21.16 bcd   | 1.54 abcd   | 7.38 i   |
| W17        | 49.26 mn   | 29.89 abc      | 20.84 cd    | 1.60 abcd   | 7.88 i   |
| W18        | 61.17 cde  | 27.39 defghij  | 11.44 kl    | 3.02 a      | 28.31 a  |
| W19        | 62.61 bcde | 24.59 lmnopq   | 12.80 ijk   | -0.13 defg  | 3.26 j   |
| W20        | 61.24 cde  | 24.92 klmnopq  | 13.84 ghij  | 0.21 bcdefg | 17.44 f  |
| W21        | 63.57 ab   | 23.90 nopq     | 12.53 ijk   | 0.50 bcdefg | 18.82 ef |
| W22        | 62.95 bcd  | 24.32 mnopq    | 12.72 ijk   | 0.12 cdefg  | 17.19 f  |
| W23        | 61.69 bcde | 26.20 hijklmn  | 12.11 jkl   | 0.38 bcdefg | 17.18 f  |
| W24        | 60.62 ef   | 27.97 cdefghi  | 11.41 kl    | 1.39 abcdef | 23.95 bc |
| W25        | 58.51 fg   | 25.45 ijklmnop | 16.03 efg   | 0.29 bcdefg | 13.72 g  |
| W26        | 57.92 g    | 27.78 cdefghi  | 14.30 fghij | 1.11 bcdef  | 19.81 de |
| W27        | 61.02 cde  | 26.42 hijklm   | 12.58 ijk   | 0.48 bcdefg | 17.46 f  |
| W28        | 62.86 bcd  | 25.22 jklmnop  | 11.91 kl    | 0.48 bcdefg | 18.38 f  |
| W29        | 58.32 fg   | 27.23 efghijk  | 14.45 fghi  | 1.10 bcdefg | 21.03 de |
| W30        | 42.11 p    | 31.68 a        | 26.21 a     | -0.80 g     | 10.39 h  |
| W31        | 53.75 hi   | 30.01 abc      | 16.23 ef    | 0.58 bcdefg | 21.53 cd |
| W32        | 59.72 efg  | 28.30 bcdefgh  | 11.98 kl    | 1.88 abc    | 25.39 b  |
| W33        | 60.90 de   | 23.68 opq      | 15.42 efgh  | -0.48 fg    | 16.22 fg |
| W34        | 63.84 ab   | 22.75 q        | 13.41 hijk  | -0.44 efg   | 16.53 f  |
| W35        | 54.15 hi   | 28.34 bcdefgh  | 17.51 e     | N.A. i      | N.A. l   |
| W36        | 65.34 a    | 24.68 lmnopq   | 9.979 l     | 0.38 bcdefg | 21.62 cd |
| W37        | 52.72 ijk  | 26.57 ghijklm  | 20.70 cd    | -0.46 efg   | 18.72 ef |
| W38        | 53.21 hij  | 26.34 hijklm   | 20.45 cd    | 0.17 cdefg  | -3.85 k  |
| W39        | 55.31 h    | 25.76 ijklmno  | 18.93 de    | -1.82 h     | 10.14 hi |
| W40        | 53.25 hij  | 26.93 fghijkl  | 19.82 cd    | -0.02 cdefg | 2.09 j   |
| W41        | 63.32 abc  | 23.29 pq       | 13.40 hijk  | -0.45 efg   | 17.47 f  |

N.A.: not available. Data values in a column with different lowercase letters are statically different ( $p \leq 0.05$ )
